# Supplementary material for: Synthesis and Characterization of the Ethylene-Carbonate-Linked L-Valine Derivatives of 4,4-Dimethylcurcumin with Potential Anticancer Activities
Source: MDPI journal article supplement (doi:10.3390/molecules26227050), 2021-11-22

# **Supporting Information**

## **Synthesis and characterization of the ethylene-carbonate-linked L-valine derivatives of 4,4-dimethylcurcumin with potential anticancer activities**

Der-Yen Lee, Hui-Yi Lin, Manickavasakam Ramasamy, Sheng-Chu Kuo, Pei-Chih Lee and Min-Tsang Hsieh

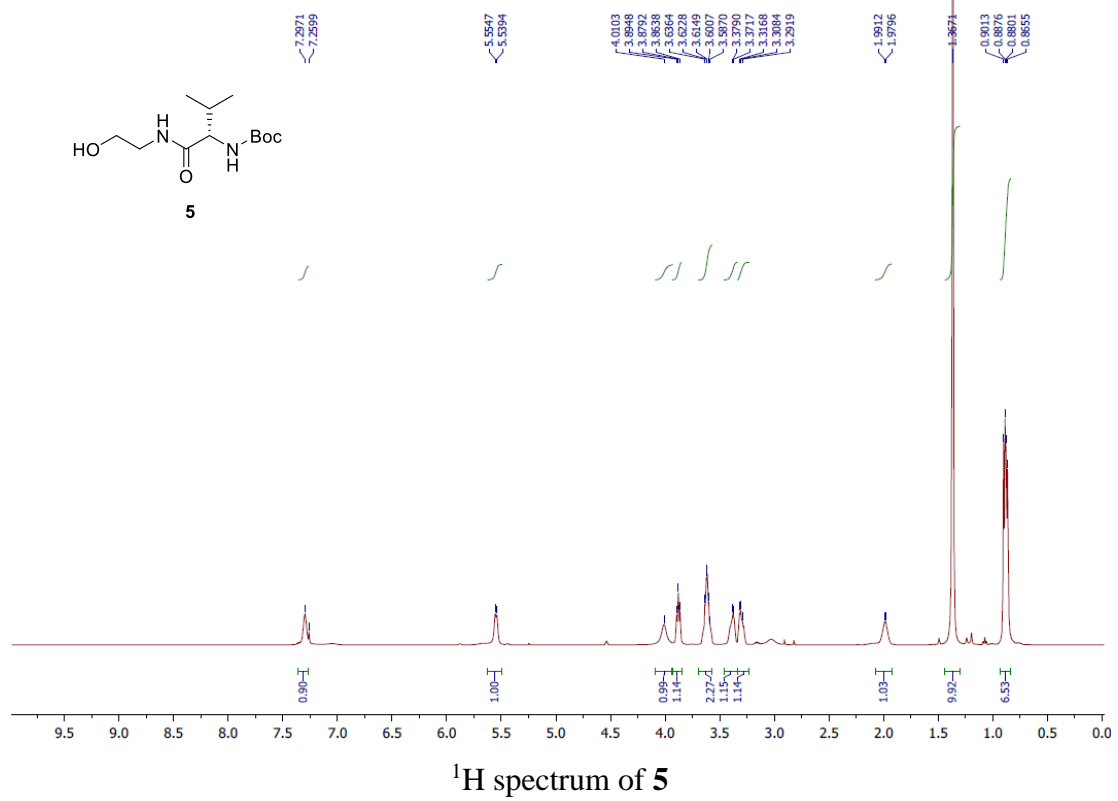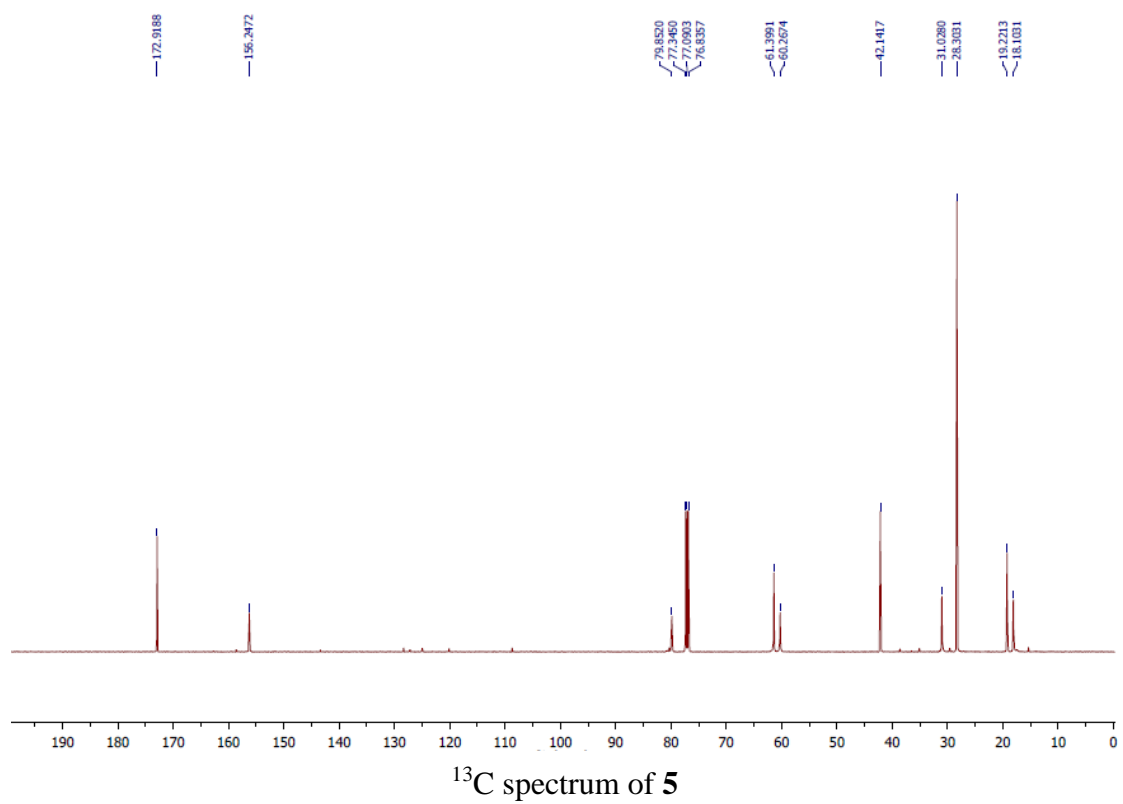

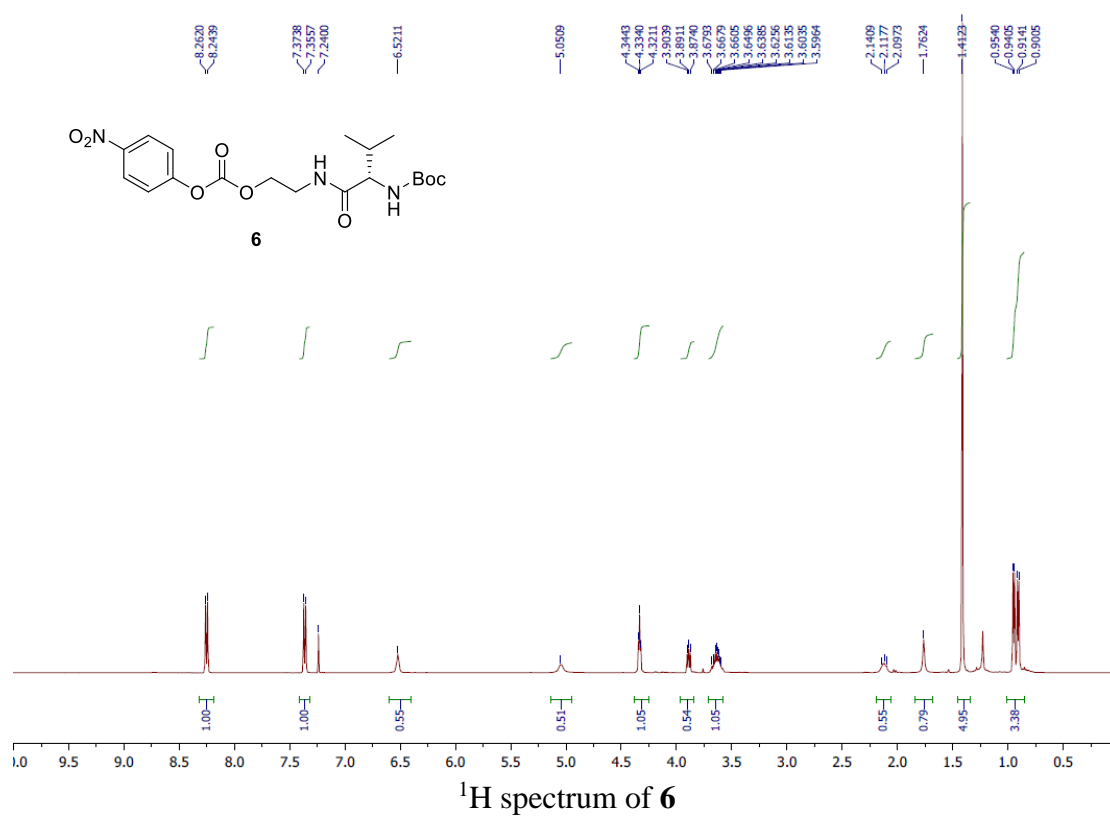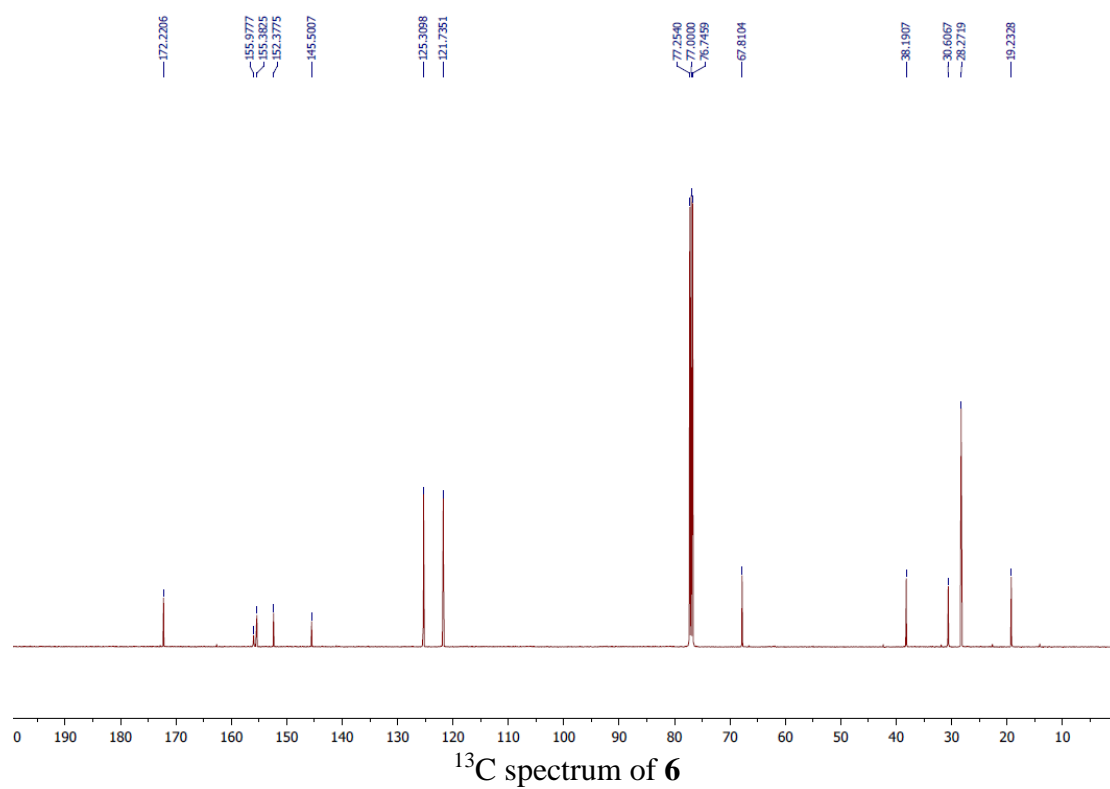

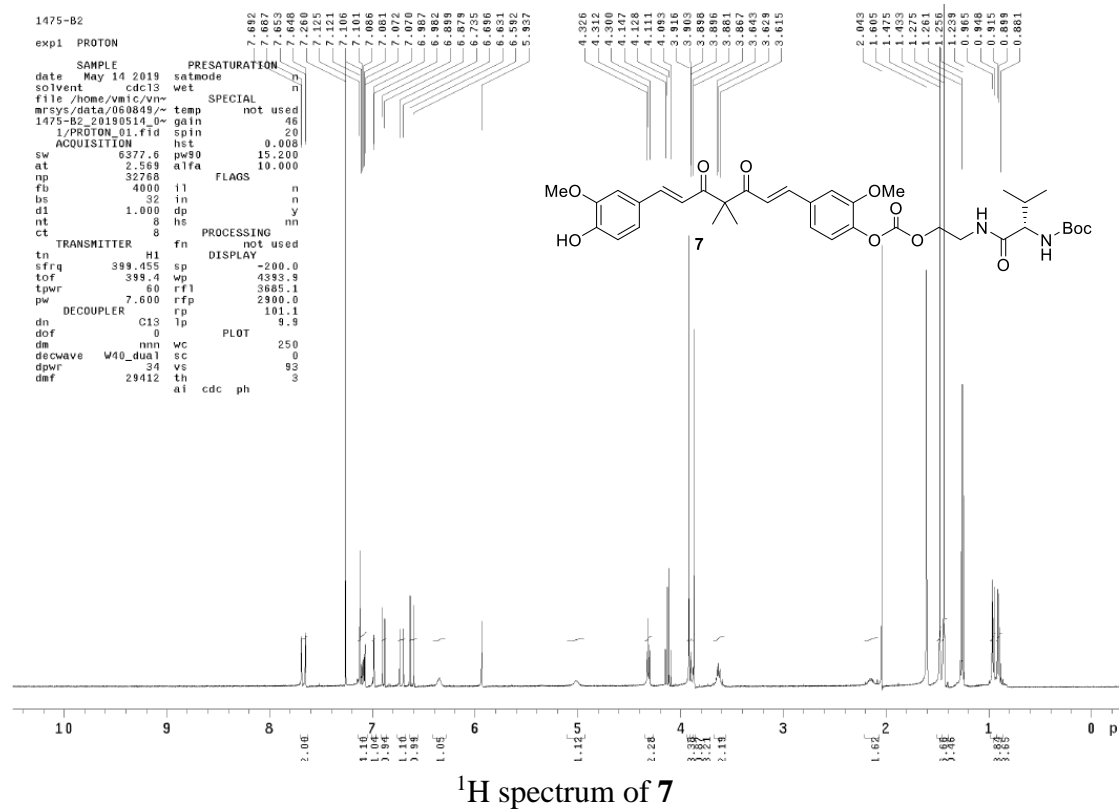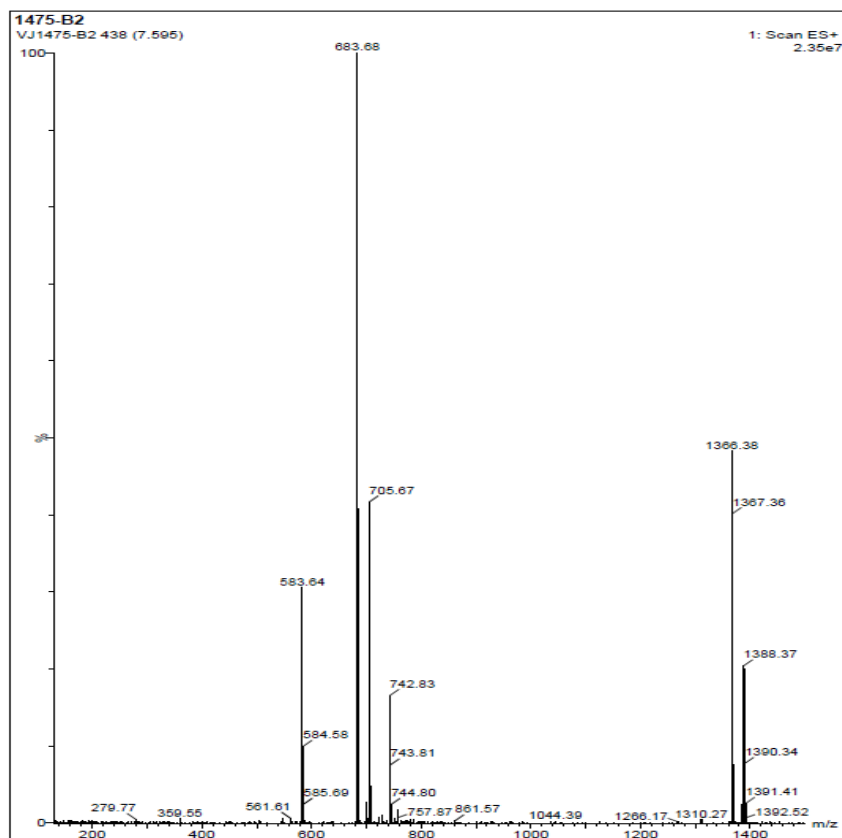

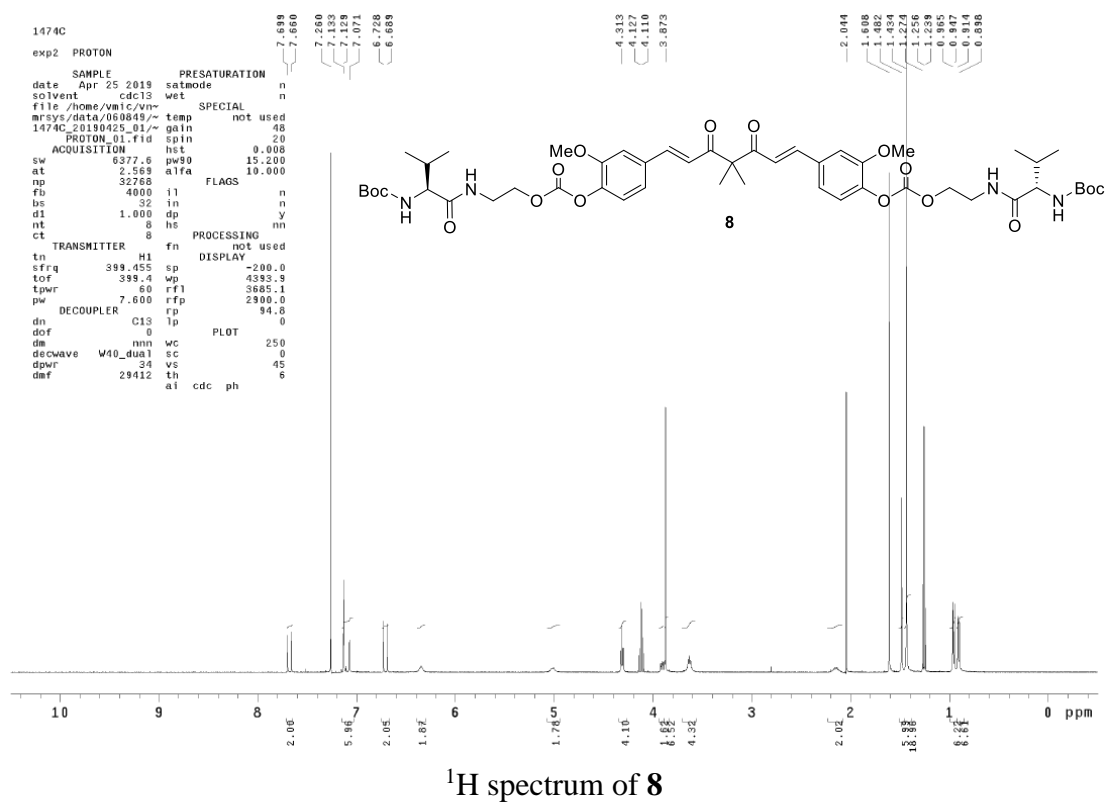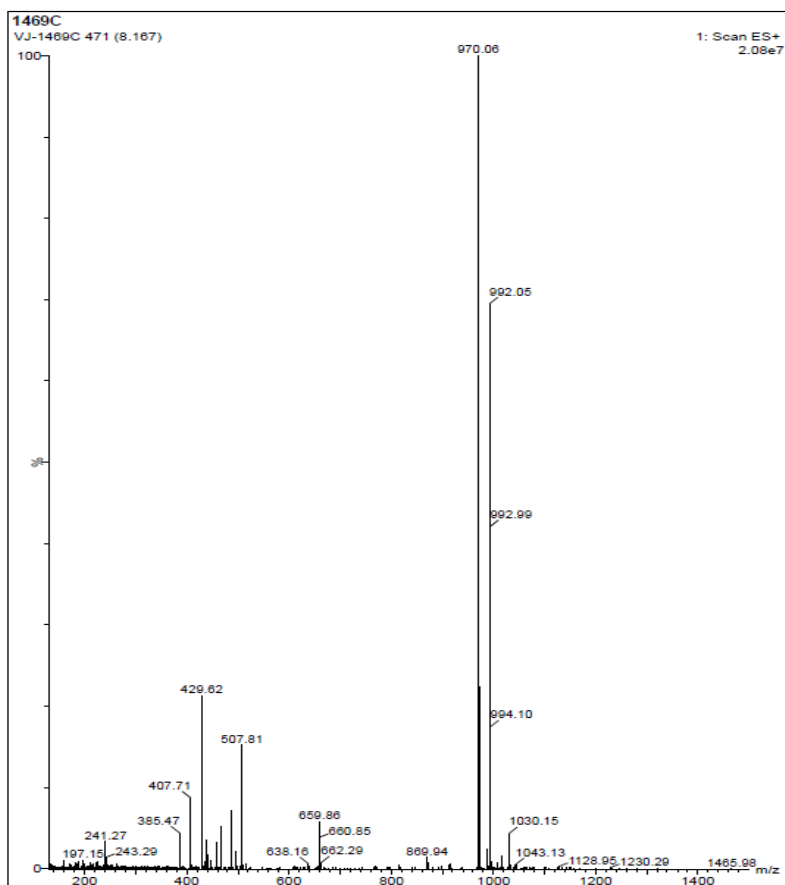

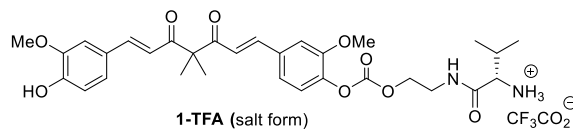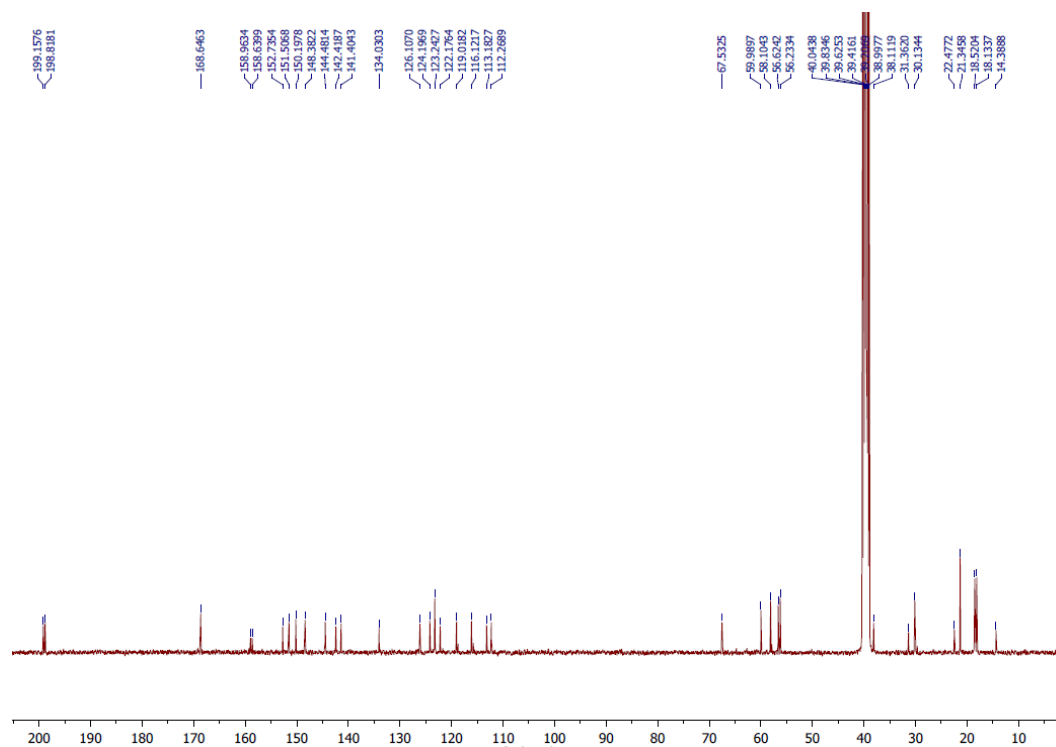 $^{13}\text{C}$  spectrum of **1-TFA**

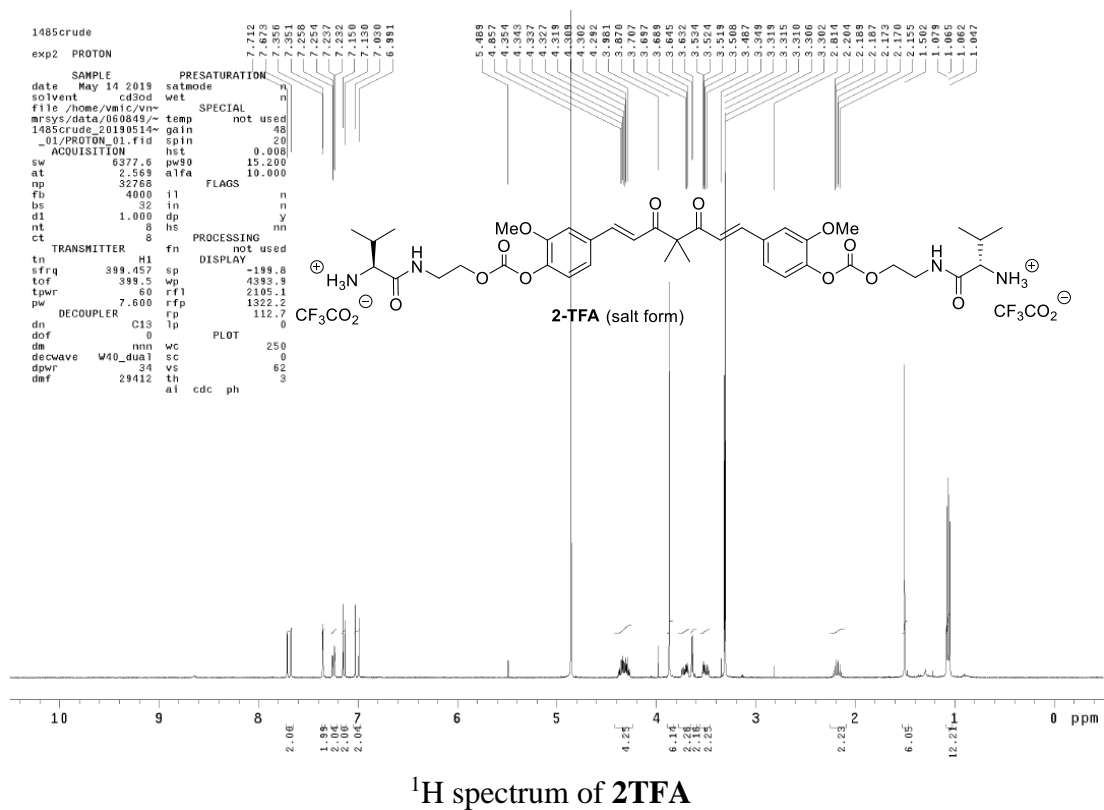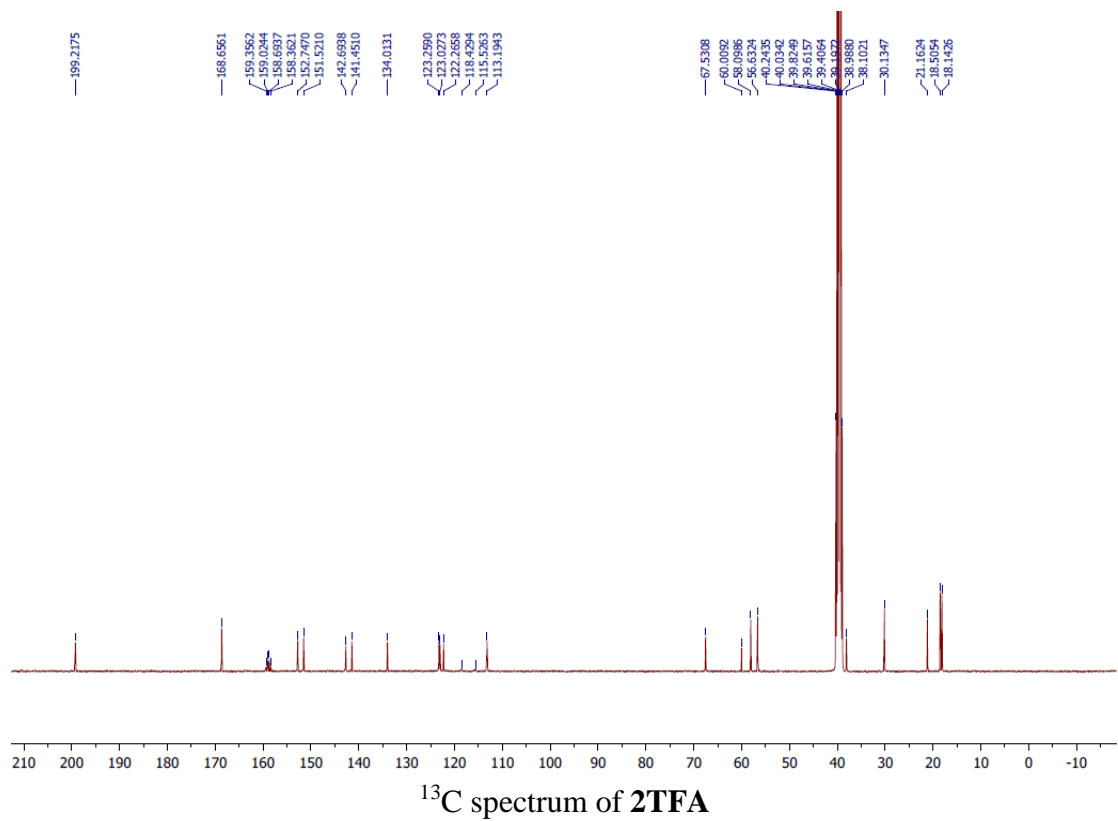

Supplement: s1 [file s1]
